# Supplementary material for: Triphenylmethyldifluoramine: a stable reagent for the synthesis of gem-bis(difluoramines)
Source: Royal Society of Chemistry journal article supplement (doi:10.1039/b203811k), 2002-01-01
Supplement: b203811k.doc [file b203811k.doc]

**Supplementary Material (ESI) for Chemical Communications**

**This journal is © The Royal Society of Chemistry 2002**

General: 1H NMR (300 MHz, Varian Unity 300 ), 13C NMR (75.4 MHz, Varian Unity 300), 19F NMR (282.2 MHz, Varian Unity 300) spectra were recorded in CDCl3 / CD2Cl2, and the chemical shifts are reported in ppm relative to tetramethylsilane / trichlorofluormethane (19F). Signals assignments that are indicated with * can be inter-changed. Infrared and Raman spectra are reported in wave numbers and were measured on a Bruker Equinox 55.

*Triphenylmethyldifluoramine (****3****):*

All works were carried out under a well vented hood behind an additional safety shield. A leather protection jacket, leather gloves and a face shield were used during all works! All steps are strictly carried out under nitrogen!

A solution of chlorotriphenylmethane (7.0g, 25 mmol in dry chlorobenzene (400 ml) was placed into a 1l three-necked flask that was equipped with a dropping funnel containing mercury (3.7ml, 250 mmol) and connected to a metal vacuum line (glass joints sealed with carbowax). The chlorotriphenylmethane solution was frozen with liquid nitrogen, evacuated and then thawed without connection to the vacuum pump. The system was then slowly charged with gaseous N2F4 up to a pressure of ca. 670 mmHg while the mixture was vigorously stirred. The pressure immediately decreased to ca. 630-600 mmHg. A few drops of Hg were added and the pressure decreased further by ca. 40-50 mmHg. After a few minutes the formation of mercury salts was observed. Once the pressure reached ca. 520 mmHg the system was charged again with N2F4 up to ca. 650 mmHg. Then Hg was added dropwise until the pressure decreased to ca. 600-580 mmHg. With time the N2F4 uptake slowed down. This procedure of charging with N2F4 and adding Hg was repeated until at least the calculated amount of N2F4 was used. The grayish suspension was then stirred overnight, cooled with ice, carefully evacuated to remove excess of N2F4 and flushed with nitrogen for 15 min. The mercury and mercury salts were filtered of under nitrogen to yield a pale yellow-orange solution. After removal of the solvent at ca. 35 ºC under vacuum the crude product was obtained as light brown solid (7.5g). After recrystallization from methanol colorless crystals (7.2g, quant.) were obtained.

IR (AgCl): = 3081, 1965, 1601, 1493, 1447, 1337, 1221, 1159, 1088, 1037, 1001, 952, 927, 879, 860, 756, 699, 661, 641, 596, 514 cm-1.

Raman (cryst.): = 3075, 3003, 1601, 1193, 1152, 1036, 1004, 914, 858, 702, 660, 619, 596, 541, 362, 312, 286, 263, 239, 95 cm-1.

1H NMR (CD2Cl2, 300 MHz):  = 7.48-7.39 (m, 6 H), 7.38-7.30 (m, 9 H) ppm.

13C NMR (CD2Cl2, 75.4 MHz):  = 139.4, 128.9, 127.2, 127.1, 87.1 (t, C-NF2) ppm; 2*J*CF = 7.5 Hz.

19F NMR (CD2Cl2, 282.2 MHz):  = + 32.4 ppm.

*4,4-Bis(difluoramino)-N-acetyl-piperidine (****16****):*

Different to the literature14 we observed two distinct signals for C-3 and C-5 in the 13C NMR spectrum.

13C NMR (CDCl3, 75.4 MHz):  = 94.2 (m, C-4), 41.7* (C-2), 36.2* (C-6), 26.1** (m, C-3), 25.8** (m, C-5), 21.4 (s, CH3) ppm.

*1,1-Bis(difluoramino)-cyclobutane (****17a****):*

1H NMR (CD2Cl2, 300 MHz):  = 2.62 (mc, 4H), 2.05 (mc, 2H) ppm.

13C NMR (CD2Cl2, 75.4 MHz):  = 96.6 (m, C-1), 24.9 (m, C-2), 13.8 (s, C-3) ppm.

19F NMR (CD2Cl2, 282.2 MHz):  = + 30.3 (s) ppm.

*1,1-Bis(difluoramino)-cyclododecane (****17b****):*

1H NMR (CDCl3 300 MHz):  = 2.65 - 1.94 (m, 4H), 1.68 – 1.52 (m, 4H), 1.44-1.34 (m, 14H) ppm.

13C NMR (CDCl3 75.4 MHz):  = 99.8 (m, C-1), 26.5, 26.1, 25.3 (q, C-2, -12), 22.7, 21.9, 19.0 ppm; 3*J*CF = 4.0 Hz.

19F NMR (CDCl3 282.2 MHz):  = + 27.4 ppm.

*1,1-Bis(difluoramino)-cyclotridecane (****17c****):*

1H NMR (CDCl3 300 MHz):  = 2.13-1.96 (m, 4H), 1.62-1.42 (m, 4H), 1.35-1.15 (m, 16H) ppm.

13C NMR (CDCl3 75.4 MHz):  = 99.1 (m, C-1), 28.3, 27.6 (m, C-2, -13), 26.7, 25.6, 25.1, 20.4 ppm.

19F NMR (CDCl3 282.2 MHz):  = + 27.1 ppm.

*2,2,5,5-Tetrakis(difluoramino)-bicyclo[2.2.1]heptane (****18****):*

1H NMR (CD2Cl2, 300 MHz):  = 2.13-2.08 (m, 1-H, 4-H), 1.48-1.42 (m, 3-Hsyn, 3-Hanti, 6-Hsyn, 6-Hanti), 1.20-1.15 (m, 7-Hendo, 7-Hexo) ppm.

13C NMR (CD2Cl2, 75.4 MHz):  = 96.6 (m, C-2, C-5), 58.2 (C-1, C-4), 40.0 (C-7), 34.6 (m, C-3, C-6) ppm.

19F NMR (CD2Cl2, 282.2 MHz):  = 41.4 (mc), 39.3 (mc) [2F]; 32.3. (mc), 30.1 (mc) [2F]; 26.9 (mc), 24.7 (mc) [2F], 26.3 (mc), 24.2 (mc) [2F] ppm; all signals are of the AB type.

*1,5-Bis(difluoramino)-9-oxatricyclo[3.3.1.03,7]nonane (****19a****):*

1H NMR (CD2Cl2, 300 MHz):  = 3.07-2.95 (m, H-3, -7), 2.70-2.59* (dm, H-2*endo*, -4*endo*, -6*endo*, -8*­endo*), 2.31-2.19* (dm, H-2*exo*, -4*exo*, -6*exo*, -8*­exo*) ppm; 2*J*H-endo,H-exo = 15.0 Hz.

13C NMR (CD2Cl2, 75.4 MHz):  = 107.7 (m, C-1, -5), 42.9 (C-3, -7), 33.5 (q, C-2, -4, -6, -8) ppm; 3*J*C,F = 7.5 Hz

19F NMR (CD2Cl2, 282.2 MHz):  = + 34.3 (2F), + 32.5 (2F) ppm.

*1,5-Bis(difluoramino)-3,7-dimethyl-9-oxatricyclo[3.3.1.03,7]nonane (****19b****):*

1H NMR (CD2Cl2, 300 MHz):  = 2.67-2.58* (dm, H-2*endo*, -4*endo*, -6*endo*, -8*­endo*), 2.33-2.24* (dm, H-2*exo*, -4*exo*, -6*exo*, -8*­exo*), 1.17 (s, CH3) ppm; 2*J*H-endo,H-exo = 15.0 Hz.

13C NMR (CD2Cl2, 75.4 MHz):  = 104.0 (m, C-1, -5), 52.1 (C-3, -7), 41.5 (q, C-2, -4, -6, -8), 22.5 (CH3) ppm; 3*J*C,F = 6.5 Hz.

19F NMR (CD2Cl2, 282.2 MHz):  = + 33.3 (2F), + 33.2 (2F) ppm.

*X-ray crystal structure of triphenylmethyldifluoramine (****3****)*

| (A) | (B) |
| --- | --- |

(A): single molecule

(B): unit cell
